# Supplementary material for: T cell development involves TRAF3IP3-mediated ERK signaling in the Golgi
Source: PubMed Central journal article supplement — J Exp Med. 2015 Jul 27;212(8):1323–36. doi: 10.1084/jem.20150110 (PMC4516800; doi:10.1084/jem.20150110), 2015-07-27
Supplement: supp_jem.20150110_JEM_20150110_sm.pdf [file supp_jem.20150110_JEM_20150110_sm.pdf]

## SUPPLEMENTAL MATERIAL

Zou et al., <http://www.jem.org/cgi/content/full/jem.20150110/DC1>**Table S1.** The primers used for genotyping PCR

| Name                              | Sequence                        |
|-----------------------------------|---------------------------------|
| WT forward primer (P1)            | 5'-AGACTGACTTGATCAGCAGCTGAG-3'  |
| WT reverse primer 1 (P2)          | 5'-AGTGACACTTCTTGAGACCTAGAAG-3' |
| KOMP common mutant primer (P3)    | 5'-GAGATGGCGCAACGCAATTAATG-3'   |
| Gene-specific primer (P4)         | 5'-AGCGTCTGTGCAATGATGCATCTTG-3' |
| KOMP 3' universal RAF primer (P5) | 5'-CACACCTCCCCCTGAACCTGAAAC-3'  |
| <i>Cd4</i> -Cre forward primer    | 5'-CCCAACCAACAAGAGCTC-3'        |
| <i>Cd4</i> -Cre reverse primer    | 5'-CCCAGAAATGCCAGATTCG-3'       |
